# Supplementary material for: Functional Characterization of a Genetic Polymorphism in the Promoter of the ESR2 Gene
Source: Springer Nature journal article supplement (doi:10.1007/s12672-011-0086-2), 2011-10-06
Supplement: MOESM1 [file 12672_2011_86_MOESM1_ESM.doc]

**Functional characterization of a genetic polymorphism in the promoter of the *ESR2* gene.**

Santosh Philips1,4, Alexandra Richter2, Steffi Oesterreich2, James M Rae3, David A Flockhart1, Narayanan B Perumal4,5, Todd C Skaar1.

1 Department of Medicine, Division of Clinical Pharmacology, Indiana University School of Medicine, Indianapolis, IN, USA. 2University of Pittsburgh Cancer Institute, Department of Pharmacology and Chemical Biology, Pittsburgh, PA, USA. 3Department of Internal Medicine, University of Michigan, Ann Arbor, MI,USA. 4Indiana University School of Informatics, Indianapolis, IN, USA.

Corresponding Author: Todd C Skaar, Ph.D., e-mail: tskaar@iupui.edu

**SUPPLEMENT TABLE:**

| **Primer Name** | **Primer Sequence (5’ -> 3’)** | **Product Size (bp)** |
| --- | --- | --- |
| 557 Fwd | catcagcaacagctgcctta | 557 [Amplicon 1] |
| 557 Rev | tctggagtagggcctgagaa |
| 700 Fwd | acccaaagcctctctggttt | 700 [Amplicon 2] |
| 700 Rev | gtgcttttcccgcattagg |
| 749 Fwd | aaacttgcagggcgaagag | 749 [Amplicon 3] |
| 749 Rev | agagggcagttgttggactc |
| ER Promo Fwd | acccaaagcctctctggttt | 410 [Amplicon 4] |
| ER Promo Rev | acgtaagcttcgataagccccttcttcc |
| *ESR2* TATA Fwd | TCAGGCACTACTCCCCTCTAC | 67 [ Amplicon 5] |
| *ESR2* TATA Rev | CGACTTAACGATAAGCCCCTTCTTC |
| *ESR2* TATA VIC | CCTCTCGGTCTTTAAAA | Taqman Probes |
| *ESR2* TATA FAM | TCTCGGTCGTTAAAA |

Table S1. Primer sequences that were used for *ESR2* PCR and DNA sequencing.
